# Supplementary material for: Deep Learning Automated Segmentation for Muscle and Adipose Tissue from Abdominal Computed Tomography in Polytrauma Patients
Source: PubMed Central journal article supplement (PMC8002279; doi:10.3390/s21062083), 2021-03-16
Supplement: sensors-21-02083-s001.pdf [file sensors-21-02083-s001.pdf]

# Deep Learning Automated Segmentation for Muscle and Adipose Tissue from Abdominal Computed Tomography in Poly-trauma Patients

Table S1. Hyper-parameters for deep learning network training.

| Hyper-Parameter                                     | Setting                                                                                                                       |
|-----------------------------------------------------|-------------------------------------------------------------------------------------------------------------------------------|
| Training-validation partition for model development | Randomly-assigned;<br>80% training (n = 2729)<br>20% validation (n = 684)                                                     |
| Convolution kernels                                 | 3 x 3, window 1 (all except final layer)<br>1 x 1, window 1 (final layer)                                                     |
| Number of deep features                             | Block 1 & 9 : 16<br>Block 2 & 8 : 32<br>Block 3 & 7 : 64<br>Block 4 & 6 : 128<br>Block 5 : 256<br>Final convolution layer : 4 |
| Activation functions                                | Parametric ReLU (all except final layer)<br>Softmax (final layer)                                                             |
| Optimizer                                           | Adam                                                                                                                          |
| Loss function                                       | Categorical cross-entropy                                                                                                     |
| Learning rate                                       | 0.0001                                                                                                                        |
| Dropout                                             | 0.05                                                                                                                          |
| L2 (ridge) regularization penalty                   | 0.001                                                                                                                         |
| Max-pooling                                         | 2 x 2, strides 2                                                                                                              |
| Batch normalization                                 | Momentum 0.99; Epsilon 0.001                                                                                                  |
| Early stopping criteria                             | Patience 2000 and delta 0.001                                                                                                 |

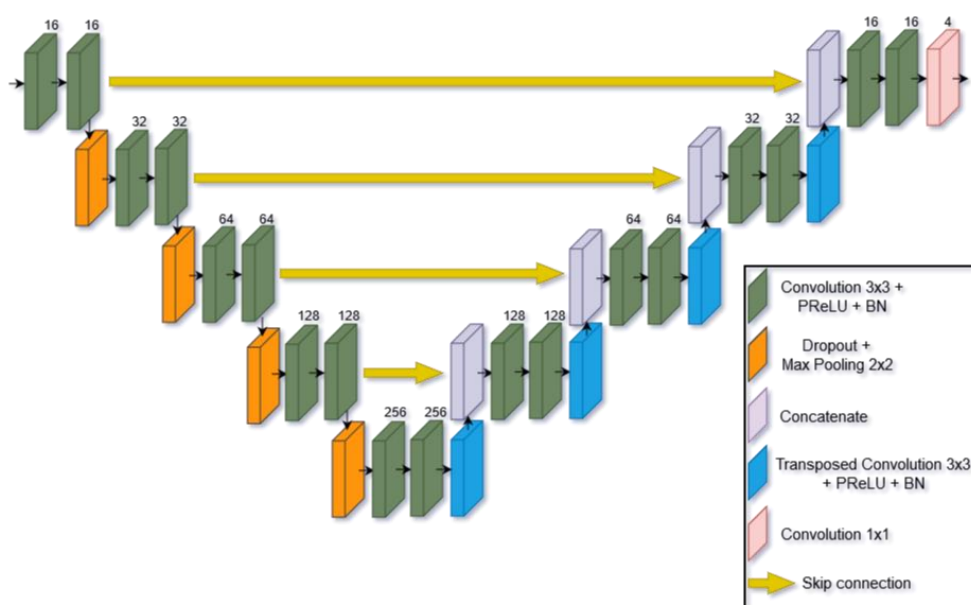

Figure S1. Schematic block diagram showing the architecture of the deep learning neural network for automatic segmentation
